# Supplementary material
Source: Springer Nature journal article supplement (https://www.springermedizin.de/resource/supplementary/12935_2011_308_MOESM2_ESM.pdf/9540282)

### Deletion Constructs of -1797 p27 (p27-Kpn I)

(a)

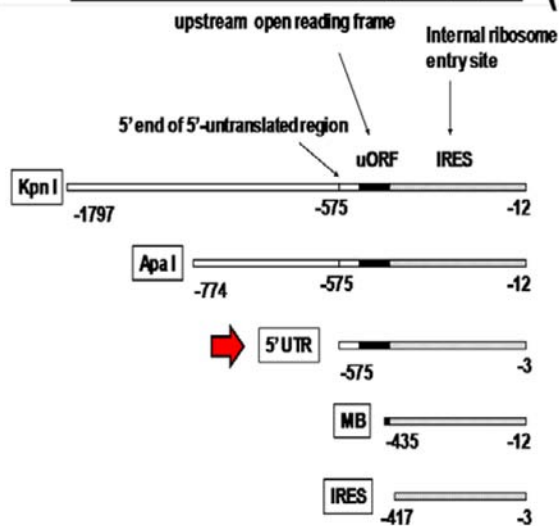

### p27-5'UTR/ MDA-MB-231 (ER-negative; also LKB1-negative)

(b)

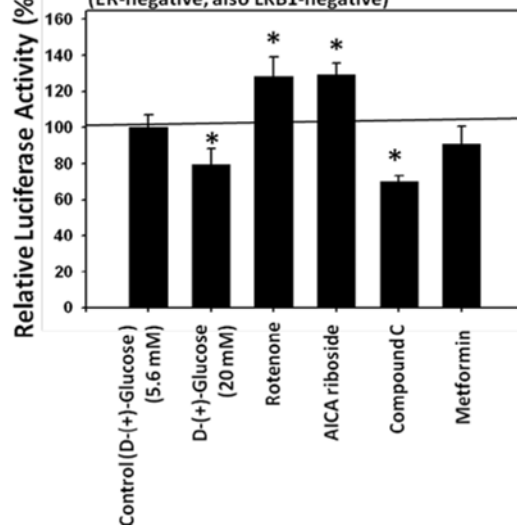

### p27Kip1-5'UTR/ MDA-MB-231 (ER-negative; also LKB1-negative)

(c)

Relative Luciferase Activity (%)

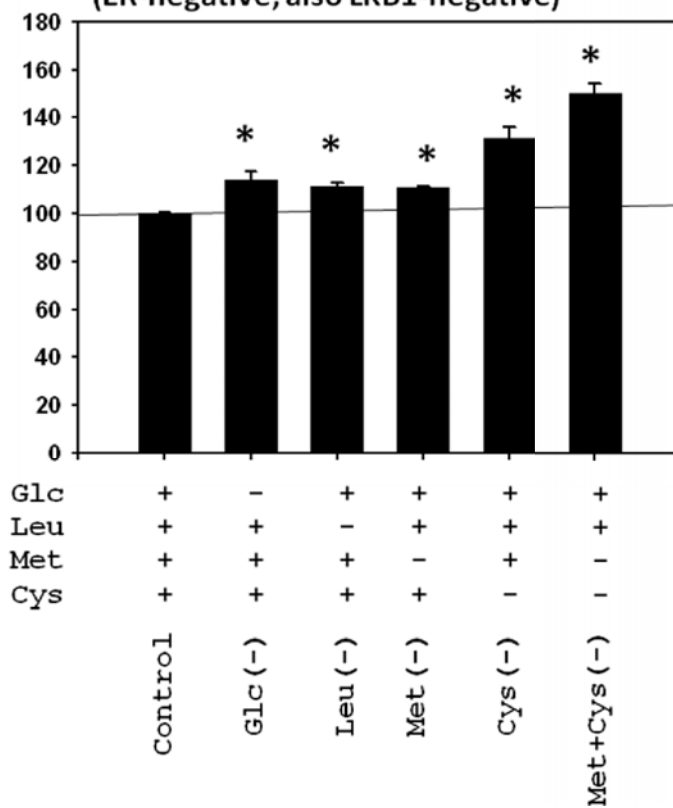

Supplement: MOESM2 [file 9540282]
